# Supplementary material for: Mieap-regulated mitochondrial quality control is frequently inactivated in human colorectal cancer
Source: PubMed Central journal article supplement (PMC4728673; doi:10.1038/oncsis.2015.43), 2016-01-04

A

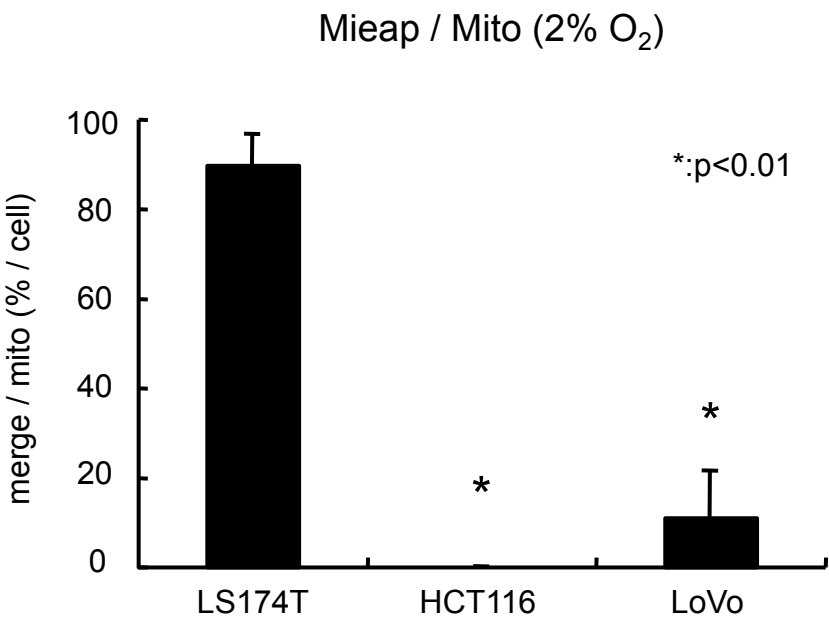

B

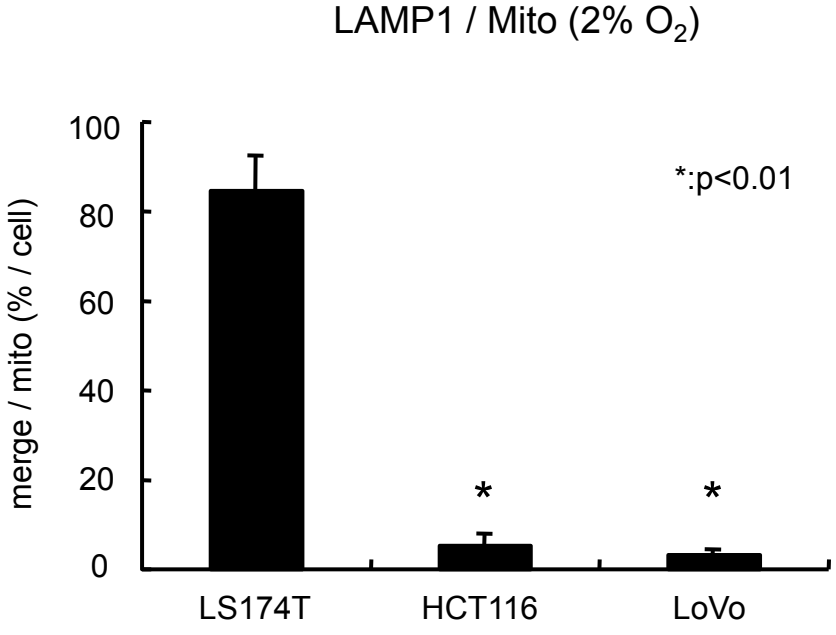

Supplement: oncsis201543x2.pdf [file oncsis201543x2.pdf]
